# Supplementary material for: A survey of vocal mimicry in companion parrots
Source: Springer Nature journal article supplement (doi:10.1038/s41598-022-24335-x), 2022-12-05

# **A Survey of Vocal Mimicry in Companion Parrots**

**Lauryn Benedict<sup>1</sup>, Alexandra Charles<sup>1</sup>, Amirah Brockington<sup>1</sup>, and Christine Dahlin<sup>2</sup>**

<sup>1</sup> University of Northern Colorado, School of Biological Sciences, Greeley CO, 80639, USA

<sup>2</sup> University of Pittsburgh at Johnstown, Department of Biology, Johnstown, PA, 15904, USA

\*lauryn.benedict@unco.edu

## **Supplementary Information**

Supplementary materials include:

- Appendix 1 - Survey text
- Appendix 2 - Sampling by species
- Appendix 3 – Sex (a) and Age (b) assignment confidence rubrics
- Appendix 4 – Output from models testing for age and sex effects among birds with high confidence age and sex assignments
- Appendix 5 - Repertoire size by sex for 19 well-sampled species
- Appendix 6 - Rates of improvisation and contextual vocalization use among well-sampled species
- Appendix 7 – Mimicked sound, phrase, and word repertoire sizes for grey parrots aged a) 0-4.5 and b) 5-50.

## Appendix 1 - Survey text

Survey Link:

[https://docs.google.com/forms/d/e/1FAIpQLSfMjo\\_mgtPpI3GHv3w90I64CaPWuPAJZWrdV3kF0q\\_lff1LBQ/closedform](https://docs.google.com/forms/d/e/1FAIpQLSfMjo_mgtPpI3GHv3w90I64CaPWuPAJZWrdV3kF0q_lff1LBQ/closedform)

Header: What Does Polly Say?

Birds have amazing abilities to learn new vocalizations and communication signals. Parrots that live in companionship with humans provide a unique opportunity to gather data about what birds of different species, ages, and sexes can learn. If you live or work with a captive parrot, we need your help! By filling out the survey below you will be contributing to research on parrot vocal behavior.

The survey will ask you 17 questions about your parrot. Parrots include: parakeets, amazons, macaws, cockatoos, cockatiels, lovebirds, and any other members of the order Psittaciformes. In particular, we will ask about three types of mimicked sounds that your parrot might make. You do not need to report on any natural "parrot sounds" - we are interested only in sounds that parrots have learned from living with humans.

1) A "mimicry sound" is a set of sounds always made together, in sequence, that mimics something in the parrot's environment, but does not consist of words. This category would include sounds like a dog's bark, a doorbell, or a whistled tune from a recognizable song.

2) A "phrase" is a set of words frequently and consistently said together "Polly wants a cracker" and "Polly is a nice bird" would each be a phrase.

3) A "word" is a single word. The phrase "Polly wants a cracker" includes 4 words. If your parrot regularly says "Polly wants a cracker" and "Polly is a nice bird" that is 7 words - do not count "Polly" or "a" twice when counting words.

Before you begin the survey, please attempt to count the number of mimicry sounds, phrases, and words that your bird makes as accurately as possible. Once you have that information ready, the survey should take about 10 minutes to complete. If you have multiple parrots to report on, please fill out the survey multiple times; once for each parrot.

Survey participation is entirely voluntary. If you begin the survey you may decide to stop and withdraw at any time. Data collected here will be used in academic research publications. All names and email addresses will be kept strictly confidential.

About us: this research is being conducted by Alexandra Charles, Dr. Lauryn Benedict, and Dr. Christine Dahlin. We are a student and two professional ornithologists with expertise in bird vocalizations and Parrot Biology. Read more about Lauryn Benedict here: <https://www.unco.edu/nhs/biology/about->

[us/benedict-lauryn/](https://christinedahlin.weebly.com/)

Read more about Christine Dahlin here: <https://christinedahlin.weebly.com/>.

Contact us at the following email address: WhatDoesPollySay@gmail.com.

Email\*

Valid email required

Please provide your name:

- About your parrot -

In this section we will collect basic information about your parrot

1. Please provide your parrot's name:
2. What species is your parrot?
3. Is your parrot male or female? (choices: Male, Female, Unknown)
4. How did you determine your parrot's sex? Check all that apply. (Choices: Appearance, Genetic Testing, Behavior, Egg-Laying, Veterinary/Expert Diagnosis, Other - write in)
5. How old is your parrot in years? If you don't know, leave the answer space blank.
6. How did you determine your parrot's age?
7. Does your parrot mimic human speech and/or other sounds (doorbells, barking dogs. etc.)? (Options: Yes, No)

- Parrot bonding -

The next three questions are about your parrot's social environment. If you answer 'no' to the next question, please skip forward to the 'Parrot Vocal Behavior' section and question 11.

Reminder: the "focal parrot" is the parrot that you are focusing on when answering the questions of this survey. If you have more than one parrot, please repeat this survey for the other parrots.

8. Does the focal parrot interact socially with other parrots? Social interaction could include: exchanging vocalizations, physical interactions, or sharing a cage. (Options: Yes, No)
9. How many other parrots does the focal parrot interact with socially?
10. How many of the other parrots are the same species as the focal parrot?

- Parrot vocal behavior -

Important terminology for the next questions:

Parrots make a wonderful range of sounds, including "parrot sounds" that are natural to their species,

and mimicked sounds that they have learned from humans or other species. For the purposes of this study, we will ask you to report on mimicked sounds only.

There are three specific types of mimicked sounds that we will ask about:

1) A "mimicry sound" is a set of sounds always made together, in sequence, that mimics something in their environment, but does not consist of words. This category would include sounds like a dog's bark, a doorbell, or a whistled tune from a recognizable song.

2) A "phrase" is a set of words frequently and consistently said together "Polly wants a cracker" and "Polly is a nice bird" would each be a phrase.

3) A "word" is a single word. The phrase "Polly wants a cracker" includes 4 words. If your parrot regularly says "Polly wants a cracker" and "Polly is a nice bird" that is 7 words - do not count "Polly" or "a" twice when counting words.

11. How many different non-speech "mimicry sounds" does your parrot make?

12. How many different "phrases" does your parrot use?

13. How many different "words" does your parrot use within all of their combined phrases?

14. Does your parrot ever improvise new phrases by reorganizing the words or phrases you reported on above?

Options:

- No, my parrot only uses words and phrases in set patterns that are the same every time
- Most of the time my parrot uses words and phrases in set patterns, but occasionally reorganizes words
- My parrot frequently "remixes" their words and phrases into new combinations

15. Does your parrot \*spontaneously\* use mimicry sounds, words, or phrases, that match the appropriate human context for that sound/phrase/word? For example, this would include making a doorbell sound when someone new enters the house or saying "feed me" just before dinnertime. This would not include mimicry such as responding "hello" to a person who said "hello".

Options:

- My parrot FREQUENTLY uses sounds/phrases/words in appropriate human context without human prompting
- My parrot SOMETIMES uses sounds/phrases/words in appropriate human context without human prompting
- My parrot NEVER uses sounds/phrases/words in appropriate human context without human prompting)

16. \*Optional\* Please list some of the words or phrases your parrot uses and their contexts

17. Is there anything else you would like to tell us?

Press the Submit button below to submit your responses. Thank you for taking the survey! If you know other parrots and their humans, please pass the survey on by sharing the URL.

## Appendix 2 - Sampling by species of the 877 parrots included in vocal learning analyses

| <u>Genus</u>  | <u>Species</u> | <u>n</u> |
|---------------|----------------|----------|
| Agapornis     | fischeri       | 12       |
| Agapornis     | roseicollis    | 1        |
| Amazona       |                | 3        |
| Amazona       | aestiva        | 23       |
| Amazona       | albifrons      | 1        |
| Amazona       | amazonica      | 3        |
| Amazona       | auropalliata   | 18       |
| Amazona       | autumnalis     | 3        |
| Amazona       | brasiliensis   | 4        |
| Amazona       | leucocephala   | 1        |
| Amazona       | ochrocephala   | 7        |
| Amazona       | oratrix        | 17       |
| Amazona       | viridigenalis  | 4        |
| Ara           |                | 2        |
| Ara           | ararauna       | 26       |
| Ara           | chloropterus   | 9        |
| Ara           | glaucogularis  | 2        |
| Ara           | macao          | 6        |
| Ara           | militaris      | 2        |
| Ara           | severus        | 4        |
| Aratinga      | jandaya        | 2        |
| Aratinga      | nenday         | 2        |
| Aratinga      | solstitialis   | 17       |
| Bolborhynchus | lineola        | 6        |
| Brotogeris    | versicolurus   | 2        |
| Cacatua       |                | 1        |
| Cacatua       | alba           | 12       |
| Cacatua       | galerita       | 10       |
| Cacatua       | goffiniana     | 9        |
| Cacatua       | moluccensis    | 9        |
| Cacatua       | sanguinea      | 3        |
| Cacatua       | sulphurea      | 10       |
| Cyanoliseus   | patagonus      | 2        |
| Cyanoramphus  | novaezelandiae | 1        |
| Diopsittaca   | nobilis        | 7        |
| Eclectus      | roratus        | 24       |
| Eolophus      | roseicapilla   | 13       |
| Eos           | bornea         | 2        |
| Eupsittula    | aurea          | 4        |
| Eupsittula    | canicularis    | 3        |
| Forpus        | coelestis      | 11       |

|               |                |     |
|---------------|----------------|-----|
| Lophochroa    | leadbeateri    | 2   |
| Lorius        | garrulus       | 2   |
| Melopsittacus | undulatus      | 35  |
| Myiopsitta    | monachus       | 49  |
| Neophema      | bourkii        | 2   |
| Nymphicus     | hollandicus    | 66  |
| Pionites      | caique         | 3   |
| Pionites      | leucogaster    | 5   |
| Pionites      | xanthomerius   | 2   |
| Pionites      | melanocephalus | 4   |
| Pionus        | chalcopterus   | 2   |
| Pionus        | maximiliani    | 5   |
| Pionus        | menstruus      | 3   |
| Poicephalus   | fuscicollis    | 1   |
| Poicephalus   | gulielmi       | 2   |
| Poicephalus   | meyeri         | 5   |
| Poicephalus   | rufiventris    | 1   |
| Poicephalus   | senegalus      | 23  |
| Polytelis     | alexandrae     | 3   |
| Polytelis     | anthopeplus    | 1   |
| Primolius     | auricollis     | 3   |
| Psittacara    | finschi        | 8   |
| Psittacara    | mitratus       | 3   |
| Psittacula    | derbiana       | 2   |
| Psittacula    | krameri        | 29  |
| Psittacus     | erithacus      | 187 |
| Pyrrhura      | frontalis      | 3   |
| Pyrrhura      | molinae        | 89  |
| Pyrrhura      | perlata        | 4   |
| Pyrrhura      | rhodocephala   | 5   |
| Pyrrhura      | rupicola       | 3   |
| Tectocercus   | acuticaudatus  | 9   |
| Touit         | dilectissimus  | 1   |
| Trichoglossus | chorolepidotus | 1   |
| Trichoglossus | moluccanus     | 6   |

### Appendix 3 - Sex and Age assignment confidence rubrics

#### a) Parrot age confidence assignment rubric

|                   |                                                                                |
|-------------------|--------------------------------------------------------------------------------|
| High Confidence   | Hatch Date<br>Breeder Knowledge<br>Juvenile Ownership                          |
| Medium Confidence | Previous Owner Knowledge<br>Leg Band<br>Veterinary/Expert Confirmation         |
|                   | Appearance: <ul style="list-style-type: none"> <li>Juvenile Plumage</li> </ul> |
| Low Confidence    | Appearance with no info<br>Behavior<br>Date of Purchase/Adoption               |

#### b) Parrot sex confidence assignment rubric:

|                   |                                                                                                                                                                                                                                                                                                                                        |
|-------------------|----------------------------------------------------------------------------------------------------------------------------------------------------------------------------------------------------------------------------------------------------------------------------------------------------------------------------------------|
| High Confidence   | Genetic Testing<br>Egg-Laying                                                                                                                                                                                                                                                                                                          |
|                   | Appearance: <ul style="list-style-type: none"> <li>Eclectus parrot (<i>Eclectus roratus</i>)</li> </ul>                                                                                                                                                                                                                                |
| Medium Confidence | Veterinary/Expert Confirmation<br>Breeder Confirmation<br>Past Owner Confirmation                                                                                                                                                                                                                                                      |
|                   | Appearance: <ul style="list-style-type: none"> <li>Pacific parrotlet (<i>Forpus coelestis</i>)</li> <li>Lord Derby's parakeet (<i>Psittacula derbiana</i>)</li> <li>Rose-ringed parakeet (<i>Psittacula krameri</i>)</li> <li>Budgerigar (<i>Melopsittacus undulatus</i>)</li> <li>Cockatiel (<i>Nymphicus hollandicus</i>)</li> </ul> |
| Low Confidence    | Behavior<br>Appearance<br>Word/Phrase Usage<br>Unknown<br>Non-Egg-Laying                                                                                                                                                                                                                                                               |

#### Appendix 4 - Models testing for age and sex effects among birds with high confidence age and sex assignments

Output of Linear Mixed Models, using only birds aged and sexed with high confidence, testing for parrot vocal mimicry repertoire variation associated with age (n=400) and sex (n=474).

| Fixed factor | Response | Estimate | Std Err | DFDen | t     | P    |
|--------------|----------|----------|---------|-------|-------|------|
| a) Age       | Sounds   | 0.0055   | 0.0054  | 366.9 | 1.02  | 0.31 |
|              | Words    | -0.0018  | 0.0065  | 368.7 | -0.28 | 0.78 |
|              | Phrases  | -0.0043  | 0.0060  | 349.3 | -0.71 | 0.48 |
| b) Sex       | Sounds   | -0.025   | 0.043   | 421.8 | -0.58 | 0.57 |
|              | Words    | -0.06    | 0.052   | 433.6 | -1.34 | 0.18 |
|              | Phrases  | -0.059   | 0.049   | 413.5 | -1.21 | 0.23 |



## Appendix 5 - Repertoire size by sex for 19 well-sampled species

Means (SD) and Wilcoxon tests on the numbers of mimicry sounds, phrases, and words used by males and females of 19 species. See Figure 2 for sample sizes. Significant p-values are in red text.

|                          | Mimicry sounds |               |       |        | Phrases       |               |       |       | Words         |               |       |        | larger<br>repertoires |
|--------------------------|----------------|---------------|-------|--------|---------------|---------------|-------|-------|---------------|---------------|-------|--------|-----------------------|
|                          | Females        | Males         | Z     | P      | Females       | Males         | Z     | P     | Females       | Males         | Z     | P      |                       |
| Galah                    | 1 (1.15)       | 5.56 (4.48)   | -2.43 | 0.015  | 2 (0.82)      | 13.44 (18.39) | -2.26 | 0.024 | 4.5 (2.08)    | 23.44 (25.19) | -2.25 | 0.024  | Male***               |
| Yellow-crested Cockatoo  | 7.8 (8.32)     | 2.75 (1.26)   | -1.36 | 0.17   | 15.4 (11.17)  | 6 (3.27)      | -1.24 | 0.22  | 34.6 (32.36)  | 13 (7.39)     | -1.24 | 0.22   | Female                |
| Sulphur-crested Cockatoo | 1              | 4.62 (3.16)   | -0.99 | 0.32   | 4             | 21.63 (32.0)  | -1.17 | 0.24  | 8             | 28.75 (17.16) | -0.59 | 0.56   | Male                  |
| White Cockatoo           | 2.33 (1.64)    | 3.67 (3.83)   | 0.25  | 0.81   | 6.83 (4.54)   | 5.5 (4.14)    | -0.41 | 0.68  | 15.67 (14.40) | 11 (6.54)     | -0.32 | 0.75   | Mixed                 |
| Cockatiel                | 10.86 (17.54)  | 4.56 (5.93)   | 0.9   | 0.37   | 12 (13.01)    | 4.07 (8.36)   | 1.59  | 0.11  | 38.43 (71.85) | 10.26 (23.93) | 1.5   | 0.13   | Female                |
| Eclectus Parrot          | 2.91 (2.26)    | 4.31 (3.2)    | -0.91 | 0.36   | 9.55 (14.61)  | 13.61 (13.59) | -1.25 | 0.21  | 16.27 (17.52) | 27 (24.49)    | -1.8  | 0.072  | Male                  |
| Rose-ringed Parakeet     | 2.86 (1.77)    | 6.15 (5.19)   | -1.59 | 0.11   | 2.71 (3.30)   | 11.15 (11.65) | -2.25 | 0.024 | 14.14 (27.39) | 23.85 (32.51) | -1.52 | 0.13   | Male*                 |
| Budgerigar               | 6.44 (10.85)   | 7.21 (7.01)   | -1.08 | 0.28   | 5.22 (8.47)   | 17.13 (21.67) | -2.03 | 0.043 | 10.44 (17.29) | 34.83 (38.67) | -2.09 | 0.036  | Male**                |
| Fischer's Lovebird       | 4.6 (5.32)     | 11.6 (21.5)   | -0.11 | 0.92   | 1 (0.71)      | 3 (5.2)       | -0.11 | 0.91  | 2.6 (2.79)    | 3 (3)         | 0     | 1      | Male                  |
| Grey Parrot              | 23.15 (30.87)  | 21.83 (29.14) | 0.57  | 0.57   | 21.99 (23.37) | 21.83 (31.22) | 0.9   | 0.37  | 60.26 (80.51) | 61.05 (85.25) | 0.67  | 0.5    | Mixed                 |
| Senegal Parrot           | 7.75 (6.29)    | 12 (14.1)     | -0.36 | 0.72   | 5.25 (6.70)   | 8.29 (12.01)  | -0.09 | 0.93  | 11 (9.56)     | 12.59 (13.43) | 0     | 1      | Male                  |
| Monk Parakeet            | 6.13 (4.53)    | 6.14 (3.47)   | -0.28 | 0.78   | 4.56 (2.85)   | 10.95 (12.28) | -1.65 | 0.098 | 10.93 (6.90)  | 24.10 (23.92) | -1.84 | 0.065  | Male                  |
| Yellow-naped Parrot      | 10.13 (10.13)  | 7.22 (9.0)    | 0.58  | 0.56   | 11.63 (7.95)  | 8 (6.48)      | 0.88  | 0.38  | 27 (19.14)    | 27.22 (30.74) | 0.24  | 0.81   | Mixed                 |
| Yellow-headed Parrot     | 11.83 (9.2)    | 4.1 (2.85)    | 2.46  | 0.014  | 10.5 (5.75)   | 9.7 (5.5)     | 0.27  | 0.78  | 20.33 (11.48) | 25.9 (18.27)  | -0.71 | 0.48   | Mixed*                |
| Turquoise-fronted Parrot | 4.63 (4.6)     | 6 (5.57)      | -0.71 | 0.48   | 11.88 (16.17) | 9 (7.87)      | 0     | 1     | 29 (39.65)    | 20.82 (18.15) | 0.25  | 0.8    | Mixed                 |
| Pacific Parrotlet        | No Data        | 2.55 (2.21)   |       |        | No Data       | 3 (2.53)      |       |       | No Data       | 6.27 (5.91)   |       |        |                       |
| Green-cheeked Parakeet   | 3.68 (4.41)    | 3.45 (3.13)   | -0.56 | 0.58   | 3.4 (3.1)     | 4.85 (4.63)   | -1.11 | 0.27  | 8.6 (11.89)   | 10 (10.09)    | -1.27 | 0.2    | Mixed                 |
| Sun Parakeet             | 1.63 (0.92)    | 2.83 (1.83)   | 1.07  | 0.28   | 0.88 (1.13)   | 3.17 (5.91)   | 0.28  | 0.78  | 2.88 (2.23)   | 7.5 (11.59)   | 0     | 1      | Male                  |
| Blue-and-yellow Macaw    | 3.13 (2)       | 11.22 (8.29)  | 2.89  | 0.0039 | 5.13 (4.16)   | 23 (32.43)    | 1.84  | 0.066 | 13.4 (9.41)   | 46.67 (47.51) | 2.63  | 0.0085 | Male**                |

## Appendix 6 - Rates of improvisation and contextual vocalization use among well-sampled species

Percentages of subjects reported to “never”, “sometimes”, or “frequently” A) show improvisation by rearranging words within phrases, and b) use mimicked sounds, words, or phrases in appropriate human context without human prompting.

| <u>Species</u>           | A) Does your parrot ever improvise by rearranging their words in phrases? |              |                  |                   | B) Does your parrot spontaneously use words in appropriate human context? |              |                  |                   |
|--------------------------|---------------------------------------------------------------------------|--------------|------------------|-------------------|---------------------------------------------------------------------------|--------------|------------------|-------------------|
|                          | <u>n</u>                                                                  | <u>Never</u> | <u>Sometimes</u> | <u>Frequently</u> | <u>n</u>                                                                  | <u>Never</u> | <u>Sometimes</u> | <u>Frequently</u> |
| Galah                    | 13                                                                        | 31%          | 54%              | 15%               | 13                                                                        | 8%           | 31%              | 62%               |
| Yellow-crested Cockatoo  | 10                                                                        | 30%          | 50%              | 20%               | 10                                                                        | 0%           | 40%              | 60%               |
| Sulphur-crested Cockatoo | 10                                                                        | 10%          | 40%              | 50%               | 8                                                                         | 13%          | 13%              | 75%               |
| White Cockatoo           | 12                                                                        | 33%          | 33%              | 33%               | 12                                                                        | 8%           | 25%              | 67%               |
| Cockatiel                | 62                                                                        | 47%          | 40%              | 13%               | 64                                                                        | 23%          | 48%              | 28%               |
| Eclectus Parrot          | 24                                                                        | 42%          | 46%              | 13%               | 24                                                                        | 8%           | 50%              | 42%               |
| Rose-ringed Parakeet     | 27                                                                        | 41%          | 26%              | 33%               | 28                                                                        | 32%          | 21%              | 46%               |
| Budgerigar               | 31                                                                        | 29%          | 32%              | 39%               | 33                                                                        | 18%          | 33%              | 48%               |
| Fischer's Lovebird       | 8                                                                         | 50%          | 25%              | 25%               | 11                                                                        | 9%           | 55%              | 36%               |
| Grey Parrot              | 185                                                                       | 15%          | 48%              | 37%               | 184                                                                       | 2%           | 26%              | 72%               |
| Senegal Parrot           | 23                                                                        | 52%          | 26%              | 22%               | 23                                                                        | 13%          | 43%              | 43%               |
| Monk Parakeet            | 49                                                                        | 29%          | 53%              | 18%               | 49                                                                        | 8%           | 37%              | 55%               |
| Yellow-naped Parrot      | 18                                                                        | 28%          | 39%              | 33%               | 18                                                                        | 0%           | 44%              | 56%               |
| Yellow-headed Parrot     | 17                                                                        | 18%          | 71%              | 12%               | 17                                                                        | 6%           | 18%              | 76%               |
| Turquoise-fronted Parrot | 22                                                                        | 18%          | 59%              | 23%               | 23                                                                        | 4%           | 43%              | 52%               |
| Pacific Parrotlet        | 11                                                                        | 36%          | 55%              | 9%                | 10                                                                        | 10%          | 70%              | 20%               |
| Green-cheeked Parakeet   | 87                                                                        | 52%          | 37%              | 11%               | 88                                                                        | 18%          | 44%              | 38%               |
| Sun Parakeet             | 14                                                                        | 79%          | 14%              | 7%                | 17                                                                        | 24%          | 29%              | 47%               |
| Blue-and-yellow Macaw    | 26                                                                        | 42%          | 42%              | 15%               | 26                                                                        | 8%           | 31%              | 62%               |

**Appendix 7 – Mimicked sound, phrase, and word repertoire sizes for grey parrots aged a) 0-4.5 and b) 5-50.**

**a)**

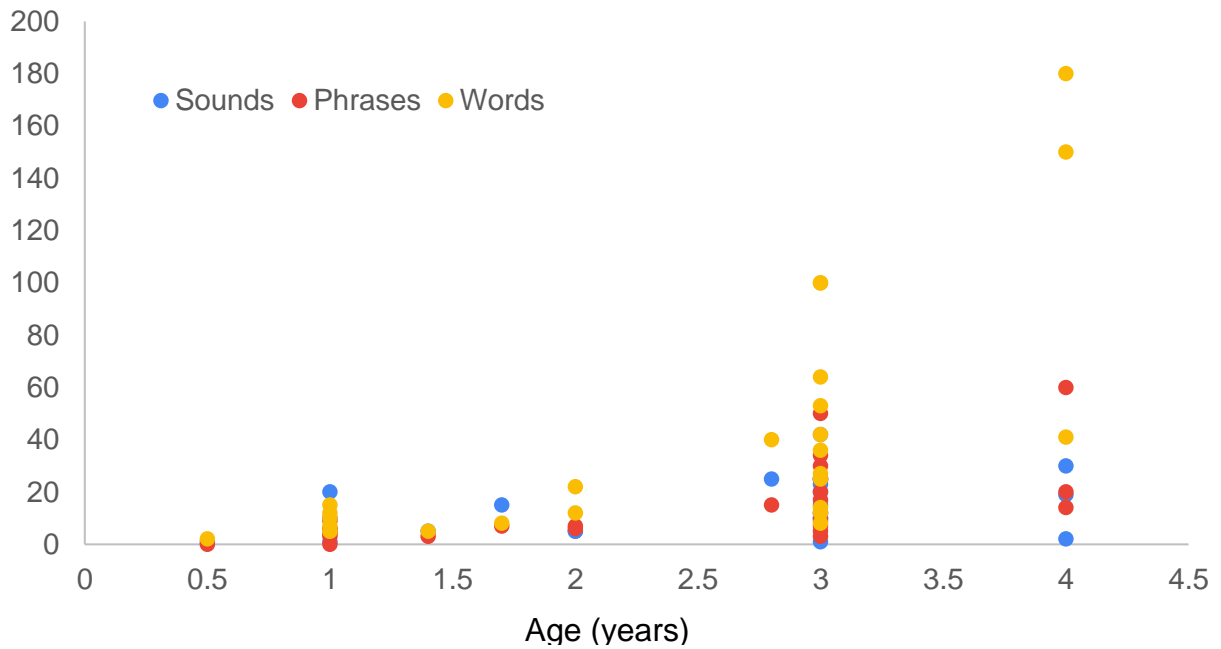

**b)**

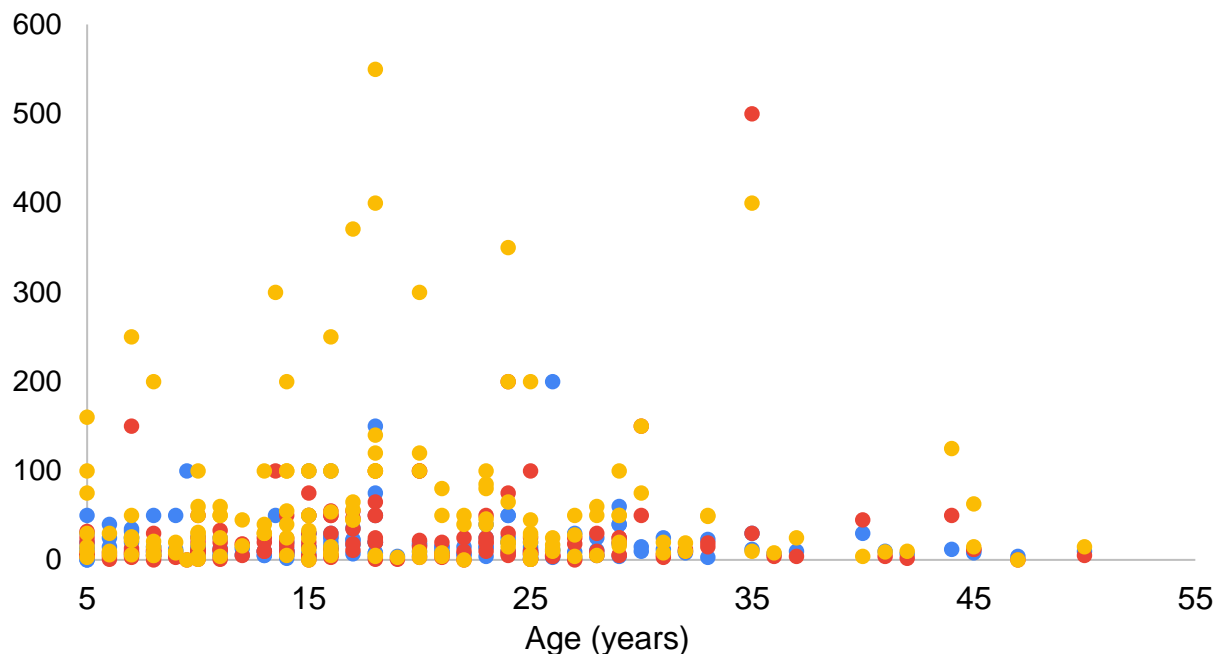

Supplement: MOESM1 [file 41598_2022_24335_MOESM1_ESM.pdf]
